# Supplementary material
Source: Springer Nature journal article supplement (https://www.springermedizin.de/resource/supplementary/12935_2009_272_MOESM5_ESM.pdf/9540202)

EFNA1

EphA2

EFNA1+EphA2

A

pcDNA

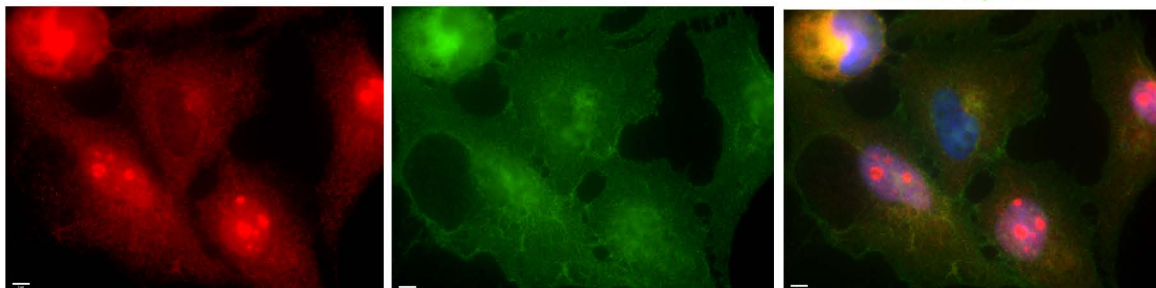

B

pcDNA

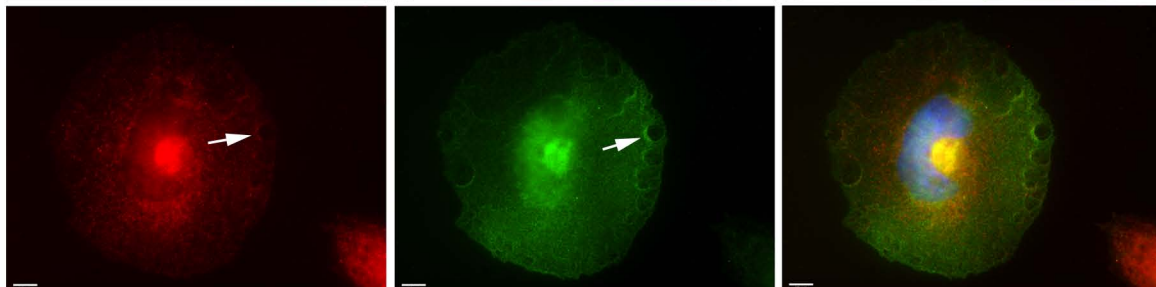

C

shRNA1

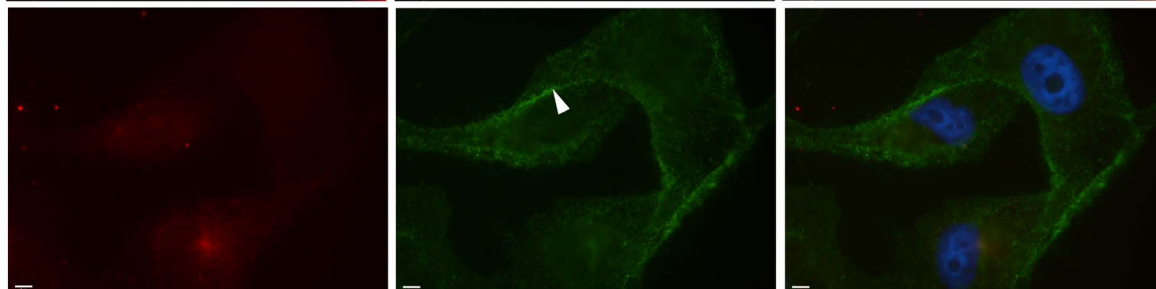

D

shRNA1

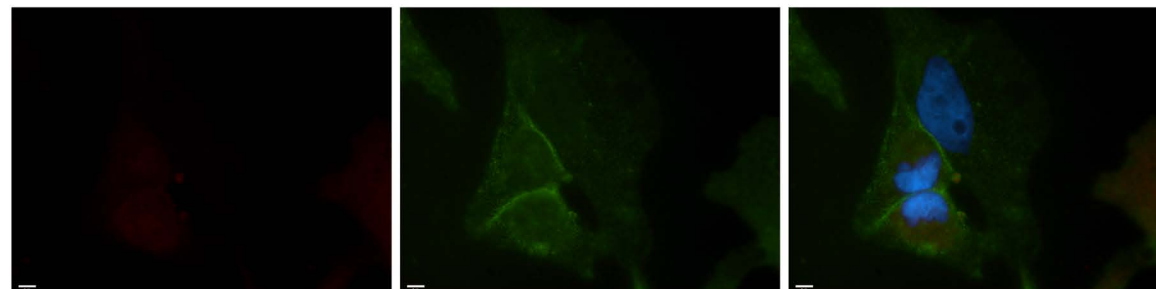

Supplement: MOESM5 [file 9540202]
